# Supplementary material
Source: Elsevier journal article supplement (https://www.sciencedirect.com/science/article/pii/S0213911115000230)
Supplement: mmc1 [file S0213911115000230:mmc1.docx]

**Anexo. Material complementario**

**Tabla I**

Comparación entre los casos y las pérdidas de seguimiento en el aborto farmacológico proveído por un servicio de telemedicina a mujeres de Latinoamérica, 2010-2011

|  | Casos | Pérdidas de seguimiento |  |
| --- | --- | --- | --- |
|  | N = 872 | N = 437 | p |
|  | n (%) | n (%) |  |
| *Edad (años)* | | | |
| 15-24 | 370 (42,4) | 197 (45,1) | 0,30 |
| 25-34 | 386 (44,3) | 195 (44,6) |
| 35 o más | 110 (12,6) | 43 (9,8) |
| No contesta | 6 (0,7) | 2 (0,5) |
| *Lugar de residencia* | | | |
| Centro América | 61 (7,0) | 25 (5,7) | 0,34 |
| Andes | 49 (5,6) | 19 (4,4) |
| Cono Sur | 161 (18,5) | 71 (16,3) |
| Brasil | 601 (68,9) | 322 (73,7) |
| No contesta | 0 | 0 (0,0) |
| *Fue difícil hacer la donación* | |  |  |
| Sí | 390 (44,7) | 55 (12,6) | 0,533 |
| No contesta | 16 (1,8) | 324 (74,1) |  |
| *Donación reducida* |  |  |  |
| Sí | 180 (20,6) | 91 (20,8) | 0,947 |
| No contesta | 3 (0,3) | 1 (0,2) |  |
| *Hijos/as* | | | |
| Sí | 132 (15,1) | 62 (14,2) | 0,66 |
| No contesta | 8 (0,9) | 5 (1,1) |  |
| *Embarazos previos* | | | |
| Sí | 377 (43,2) | 192 (43,9) | 0,81 |
| No contesta | 12 (1,4) | 6 (1,4) |  |
| *Abortos previos* | | | |
| Sí | 51 (5,9) | 28 (6,4) | 0,68 |
| No contesta | 8 (0,9) | 5 (1,1) |  |
| *Semana gestacional en el momento de la consulta* | | | |
| Hasta 7 semanas | 749 (85,9) | 384 (87,9) | 0,02 |
| Entre 8 y 9 semanas | 54 (6,2) | 21 (4,8) |
| 10 o más semanas | 4 (0,5) | 9 (2,1) |
| No contesta | 65 (7,5) | 23 (5,3) |

**Tabla II**

Asociación de las variables del estudio y la satisfacción con el aborto farmacológico proveído por un servicio de telemedicina a mujeres de Latinoamérica, 2010-2011

|  | Satisfacción | |
| --- | --- | --- |
|  | n (%) | p |
| *Edad (años)* | | |
| 15-24 | 365 (98,6) | 0,624 |
| 25-34 | 374 (97,7) |
| 35 años | 108 (98,2) |
| *Lugar de residencia* | | |
| Centro América | 57 (96,6) | 0,678 |
| Andes | 48 (98,0) |
| Cono Sur | 155 (97,5) |
| Brasil | 584 (98,5) |
| *Dificultad para hacer la donación* | | |
| No | 453 (98,3) | 0,724 |
| Sí | 379 (97,9) |
| *Donación reducida* | | |
| No | 666 (98,1) | 0,841 |
| Sí | 175 (98,3) |
| *Hijos/as* |  |  |
| No | 707 (98,1) | 0,748 |
| Sí | 129 (98,5) |
| Embarazos previos | | |
| No | 469 (98,1) | 0,992 |
| Sí | 363 (98,1) |
| *Abortos previos* | | |
| No | 787 (98,1) | 0,948 |
| Sí | 49 (98,0) |
| *Semana gestacional cuando tomó las pastillas* | | |
| Hasta 7 semanas | 319 (97,3) | 0,513 |
| Entre 8 y 9 semanas | 307 (98,4) |
| Entre 10 y 11 semanas | 130 (99,2) |
| 12 semanas o más | 37 (97,4) |
